# Supplementary material for: Turning randomness into meaning at the molecular level using Muller's morphs
Source: PubMed Central journal article supplement — Biol Open. 2012 Feb 27;1(4):405–10. doi: 10.1242/bio.2012031 (PMC3509460; doi:10.1242/bio.2012031), 2012-02-27
Supplement: supp_bio.2012031_bio.2012031TableS1.pdf [file supp_bio.2012031_bio.2012031TableS1.pdf]

## Mendel's Factors & Muller's mutations - page 1 of 9

As you almost certainly already know (and can review here), in the 1800's Mendel deduced the existence of genetic factors (which we now know as genes).

These factors are passed unaltered from parent to offspring - but importantly, not all factors held by a parent are transmitted (note on simplifications).

Each parent has two copies of each gene, but one and only one copy is transmitted to any particular offspring. Which copy is transmitted is random (stochastic).

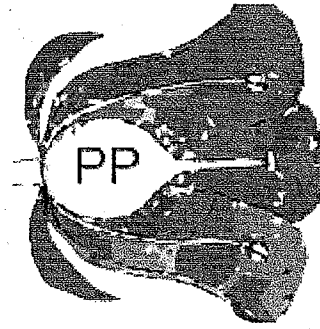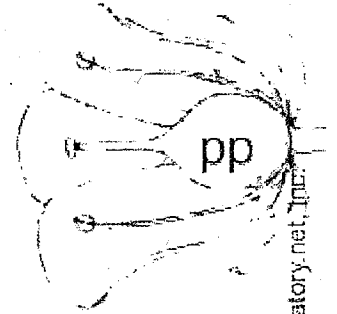

Mendel's hypothesis:

Pure-bred lines carry two copies of the factor that determines flower color.

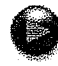

©2001 - virtuallaboratory.net, Inc.

As you answer these questions, remember, there is rarely a single correct answer.

**What did Mendel know about the physical nature of his factors?**

He knew it was in the pollen. These had heritable  
They controlled physical characteristics and were heritable

**Does thinking at the molecular level clarify or confuse your understanding genes and mutations?**

Clarifies. Knowing the mechanisms help us to understand  
and knowing the structures helps.

**submit**

© quixotic partners

## Mendel's Factors & Muller's mutations - page 2 of 9

One of Mendel's major discoveries was that genes can exist in different forms, now known as **alleles**. Within a particular organism, there are two alleles of each gene; these alleles can be the same or different.

While there are at most two different alleles within a single organism, there can be many different alleles within a population. Typically, the most common alleles are known as "wild type".

An important question is, where did these various alleles come from? One hint came from the observation that new alleles could arise spontaneously - these new alleles are known as mutations.

Herman J. Muller won the Nobel prize in 1946 for his work showing that mutations could be generated by exposing an organism to radiation, specifically X-rays.

As you answer these questions, remember, there is rarely a single correct answer.

**What does the ability of X-rays to generate mutations tell you about the physical nature of genes?**

~~They are not static, they are vulnerable to interactions and control by other molecules.~~  
 NO, because Muller didn't show where the mutation occurred (in the gene or in the gene product.)

**Does it tell you anything about the physical nature of gene products?**

See above. We don't know if the mutation occurs in translation, txn, or post-translation

submit

© quixotic partners

## Mendel's Factors & Muller's mutations – page 3 of 9

Let us assume that each gene encodes a gene product (we are not concerned about what a gene product is or what it does). We can now consider all of the logically possible effects of a mutation. Compared to the original, or "wild type" gene product ("*wt*"), the mutant gene product ("*mut*") could be

- more active
- less active
- totally inactive or absent, or
- have a new activity
- or have no effect

There are two more possibilities. The first arises because there are two copies of each gene in an organism – it is therefore possible that the mutated (*mut*) gene product could interfere with the activity of the wild type mutant (*wt*) gene product. We will call this

- antagonistic

Finally, there could be mutations that produce no visible effect, we will call these

- neutral

As you can imagine, neutral mutations are difficult to identify or study.

As you answer this question, remember, there is rarely a single correct answer.

- When a mutation in a gene occurs, the mutated gene product is most likely to be (compared to the original gene product)...
- neutral
  - more active
  - less active >
  - inactive or absent
  - have a new activity
  - interfere with the activity of the wild type gene product

Please explain the logic of your answer.

submit

## Mendel's Factors & Muller's mutations - page 4 of 9

Now here is Muller's trick - a way of evaluating the activity of a gene without knowing what that activity is!

In the fruit fly *Drosophila melanogaster*, the organism that Muller worked with, it is possible to make deletions and duplications of genes. We can analyze their effects based on some (over simplistic) assumptions:

- the deletion of a gene (which we note as  $\Delta$ ) leads to the absence of the gene product.
- the duplication of a gene (which we note as  $2x$ ) leads to twice the gene activity.

As you answer this question, remember, there is rarely a single correct answer.

If you know your molecular biology, you know that there are cases where these assumptions are not strictly true. Can you describe such situations.

- Multiple copies of the gene
- Biosynthetic pathways/feedback/combinations could all be affected by deletion of single genes. ie multiple gene products  $\Delta$
- ~~doubling gene product may not increase~~
- double gene does not necessarily lead to  $2x$  ~~gene product~~ <sup>gene activity</sup>
- because the gene may be regulated by other factors.

submit

© quixotic

## Mendel's Factors & Muller's mutations – page 5 of 9

We will use deletions and duplication to compare the activity of the original version of the gene (*wt*) with the mutant version (*mut*). *Drosophila* is diploid, so there are (normally) two copies of each gene. We indicate our situation as

$\frac{wt}{wt}$  produces the original phenotype

$\frac{mut}{wt}$  produces the mutant phenotype, if *mut* is dominant

$\frac{mut}{mut}$  produces the mutant phenotype, if *mut* is recessive

For the moment, let us assume that *mut* is recessive for the trait we are looking at (remember, recessive and dominant are not absolutes; a mutation/allele can be recessive for one trait and dominant for another).

Now let us ask, is the phenotype of

$\frac{mut}{\Delta}$  the same, more, or less severe (extreme) than the phenotype of  $\frac{mut}{mut}$  ?

If  $\frac{mut}{\Delta}$  and  $\frac{mut}{mut}$  individuals have the same phenotype, Muller concluded that that *mut* does not encode a functional gene product; either no product is produced or the product produced has no activity - he called such a mutation/allele **amorphic** (no activity).

If the phenotype of  $\frac{mut}{mut}$  is less severe than that of  $\frac{mut}{\Delta}$ , Muller concluded that *mut* produced a gene product with some, but less than normal activity - he called that a **hypomorphic** (low activity) allele.

As you answer these questions, remember, there is rarely a single correct answer.

Why (do you think) Muller <sup>came</sup> ~~come~~ to these conclusions?

- If *mut* is recessive and has an active gene product, then  $\frac{mut}{mut}$  would show a recessive trait, and  $\frac{mut}{\Delta}$  would look different (assuming that gene dosage is a factor).
- ↳ Therefore, because the flies look the same the gene product must be inactive.

In molecular terms, how might a mutation reduce but not eliminate or change the activity of a gene product ?

↳ A mutation could alter the 3D structure of available binding domains, which would lessen the binding specificity (but not inhibit).

## Mendel's Factors & Muller's mutations - page 6 of 9

To extend our analysis, let us now compare the "strength" of the trait expressed in organisms with the following genotypes. Remember we have been assuming that that *mut* is recessive. We find that the phenotype of

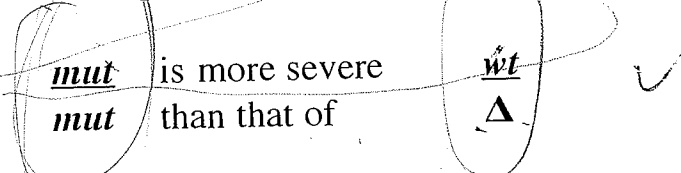

is more severe than that of

If *mut* is dominant (with respect to the trait we are considering) then,

*mut* is more severe than that of *wt* which is more severe than  $\Delta$ .

Muller concluded that *mut* produced either more of, or a more active version of the gene product than *wt* version of the gene. He termed such an allele **hypermorphic** (more function).

As you answer these questions, remember, there is rarely a single correct answer.

**How (do you think) did Muller come to this conclusion?**

Because too much gene product creates a phenotype that is bad. So  $\Delta$  *mut* creates overactive *mut* + *wt* will create more severe phenotype.

**In molecular terms, how could a mutation increase, but not change the activity of a gene product?**

If you increase the activity of a gene product, you are changing the activity. This question is poorly worded.

submit

© quixotic partners

## Mendel's Factors & Muller's mutations – page 7 of 9

At this point, we have found a way to identify (using deletions and duplications of the gene under study), whether a mutation abolishes gene function, reduces it, or enhances it. But are there other possible effects of a mutation?

Muller found some. Consider the following is the case. The trait is dominant<sup>†</sup> and the phenotype of

$\frac{mut}{wt}$  is more severe than that of  $\frac{mut}{2x wt}$

Muller called mutations that behaved in this way **antimorphic**, that is, the mutated gene product function antagonized the function of the wild type gene product.

A related behavior can be observed with a recessive trait, in this case

$\frac{mut}{mut}$  is less severe than that of  $\frac{2x mut}{wt}$

but this requires that we have a duplication of the mutant allele.

As you answer these questions, remember, there is rarely a single correct answer.

**How (do you think) did Muller come to his conclusion about antimorphic mutations?**

**In molecular terms, how could a mutation produce an antimorphic gene product?**

## Mendel's Factors & Muller's mutations – page 8 of 9

Muller identified one final class of mutation, their behavior was described by the following relationship; the phenotype of

$\frac{mut}{mut}$  is the same as or worse than  $\frac{mut}{\Delta}$  but different from  $\frac{wt}{wt}$

Remember, we are assuming that *mut* is recessive!  
If *mut* is dominant then the phenotype of

$\frac{mut}{\Delta}$  is the same as  $\frac{mut}{wt}$  is the same as  $\frac{mut}{2x wt}$

Muller called such mutations **neomorphic**; he assumed that the mutated gene product had a new function or activity, a function/activity that the original gene product did not have.

As you answer these questions, remember, there is rarely a single correct answer.

**How (do you think) did Muller come to this conclusion? ?**

**In molecular terms, how could a mutation produce a neomorphic gene product?**

**submit**

© quixotic partners



## Mendel's Factors & Muller's mutations – page 9 of 9

At this point we have exhausted the universe of possible types of mutations. For any particular trait, influenced by a mutation, we can place the mutation in one of Muller's groups, or in the group with no effect, which we could call neutral or "normomorphic".

That said, remember we are talking about the mutation's effects on a single trait. The situation gets more complex when we recognize that many traits are influenced by multiple genes, and many genes influence multiple traits, but we will worry about that elsewhere.

As you answer these questions, remember, there is rarely a single correct answer.

**Which types of mutation might enhance an organism's ability to adapt to a new environment, and how would that work?**

Hypermorphic: if theres an envi pressure you need to resist more heartily

Neomorphic

All but amorphic, in changing environment.

**If mutations are random, how can they generate new behaviors, functions, and adaptations?**

Random mutations that have a beneficial & visible effect on the organism's fitness, will be passed on (if the mutation is in the gametes)

and thru further mutations can develop, more specifically, new forms & adaptations.

submit

© quixotic partners

## Mendel's Factors & Muller's mutations - page 1 of 9

As you almost certainly already know (and can review here), in the 1800's Mendel deduced the existence of genetic factors (which we now know as genes).

These factors are passed unaltered from parent to offspring - but importantly, not all factors held by a parent are transmitted (note on simplifications).

Each parent has two copies of each gene, but one and only one copy is transmitted to any particular offspring. Which copy is transmitted is random (stochastic).

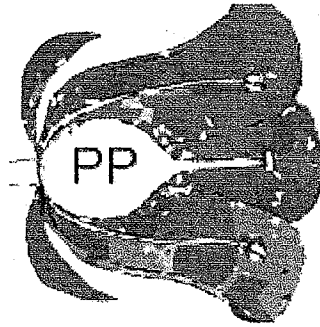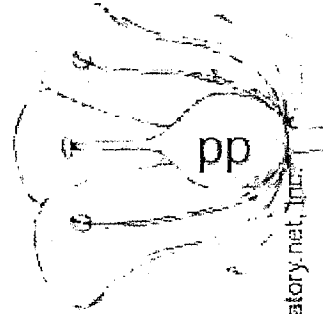

Mendel's hypothesis:

Pure-bred lines carry two copies of the factor that determines flower color.

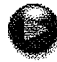

©2007 - virtuallaboratory.net, Inc.

As you answer these questions, remember, there is rarely a single correct answer.

**What did Mendel know about the physical nature of his factors?**

*They were quant: diable*

**Does thinking at the molecular level clarify or confuse your understanding genes and mutations?**

*Helps ... Gives distinct descriptions of where the changes come from*

**submit**

© quixotic partners

## Mendel's Factors & Muller's mutations - page 2 of 9

One of Mendel's major discoveries was that genes can exist in different forms, now known as **alleles**. Within a particular organism, there are two alleles of each gene; these alleles can be the same or different.

While there are at most two different alleles within a single organism, there can be many different alleles within a population. Typically, the most common alleles are known as "wild type".

An important question is, where did these various alleles come from? One hint came from the observation that new alleles could arise spontaneously - these new alleles are known as mutations.

Herman J. Muller won the Nobel prize in 1946 for his work showing that mutations could be generated by exposing an organism to radiation, specifically X-rays.

As you answer these questions, remember, there is rarely a single correct answer.

**What does the ability of X-rays to generate mutations tell you about the physical nature of genes?**

That they can ~~be~~ change

**Does it tell you anything about the physical nature of gene products?**

that they can change too

**submit**

© quixotic partners

## Mendel's Factors & Muller's mutations – page 3 of 9

Let us assume that each gene encodes a gene product (we are not concerned about what a gene product is or what it does). We can now consider all of the logically possible effects of a mutation. Compared to the original, or "wild type" gene product ("*wt*"), the mutant gene product ("*mut*") could be

- more active
- less active
- totally inactive or absent, or
- have a new activity

There are two more possibilities. The first arises because there are two copies of each gene in an organism – it is therefore possible that the mutated (*mut*) gene product could interfere with the activity of the wild type mutant (*wt*) gene product. We will call this

- antagonistic

Finally, there could be mutations that produce no visible effect, we will call these

- neutral

As you can imagine, neutral mutations are difficult to identify or study.

As you answer this question, remember, there is rarely a single correct answer.

When a mutation in a  neutral  
 gene occurs, the mutated  more active  
 gene product is most  less active  
 likely to be (compared to  inactive or absent  
 the original gene  have a new activity  
 product)...  interfere with the activity of the wild type gene product

Please explain the logic of your answer.

There are more ways to not work than there are to work so if the change is by chance, it will most likely make it work poorly or not at all.

submit

## Mendel's Factors & Muller's mutations - page 4 of 9

Now here is Muller's trick - a way of evaluating the activity of a gene without knowing what that activity is!

In the fruit fly *Drosophila melanogaster*, the organism that Muller worked with, it is possible to make deletions and duplications of genes. We can analyze their effects based on some (over simplistic) assumptions:

- the deletion of a gene (which we note as  $\Delta$ ) leads to the absence of the gene product.
- the duplication of a gene (which we note as  $2x$ ) leads to twice the gene activity.

As you answer this question, remember, there is rarely a single correct answer.

**If you know your molecular biology, you know that there are cases where these assumptions are not strictly true. Can you describe such situations.**

There are regulatory junctions in the genome. Duplicating a silenced gene won't make any more gene product while the removal of a silenced gene make it any quieter.

**submit**

© quixotic partners

## Mendel's Factors & Muller's mutations – page 5 of 9

We will use deletions and duplication to compare the activity of the original version of the gene (*wt*) with the mutant version (*mut*). *Drosophila* is diploid, so there are (normally) two copies of each gene. We indicate our situation as

$\frac{wt}{wt}$  produces the original phenotype

$\frac{mut}{wt}$  produces the mutant phenotype, if *mut* is dominant

$\frac{mut}{mut}$  produces the mutant phenotype, if *mut* is recessive

For the moment, let us assume that *mut* is recessive for the trait we are looking at (remember, recessive and dominant are not absolutes; a mutation/allele can be recessive for one trait and dominant for another).

Now let us ask, is the phenotype of

$\frac{mut}{\Delta}$  the same, more, or less severe (extreme) than the phenotype of  $\frac{mut}{mut}$  ?

If  $\frac{mut}{\Delta}$  and  $\frac{mut}{mut}$  individuals have the same phenotype, Muller concluded that that *mut* does not encode a functional gene product; either no product is produced or the product produced has no activity - he called such a mutation/allele **amorphic** (no activity).

If the phenotype of  $\frac{mut}{mut}$  is less severe than that of  $\frac{mut}{\Delta}$ , Muller concluded that *mut* produced a gene product with some, but less than normal activity - he called that a **hypomorphic** (low activity) allele.

As you answer these questions, remember, there is rarely a single correct answer.

### Why (do you think) Muller came to these conclusions?

Having two copies of a gene what functional gene product is better than only one so if  $\frac{mut}{mut}$  is better off than  $\frac{mut}{\Delta}$  the product should have some, but low, activity

In molecular terms, how might a mutation reduce but not eliminate or change the activity of a gene product ?

degeneracy in the genetic code could explain no effect, some amino acids are similar to each other so exchange could lower activity, but not change it.

## Mendel's Factors & Muller's mutations - page 6 of 9

To extend our analysis, let us now compare the "strength" of the trait expressed in organisms with the following genotypes. Remember we have been assuming that that *mut* is recessive. We find that the phenotype of

*mut* is more severe than that of *wt*  
 $\Delta$

If *mut* is dominant (with respect to the trait we are considering) then,

*mut* is more severe than that of *2x wt* which is more severe than *wt*  $\Delta$

Muller concluded that *mut* produced either more of, or a more active version of the gene product than *wt* version of the gene. He termed such an allele **hypermorphic** (more function).

As you answer these questions, remember, there is rarely a single correct answer.

**How (do you think) did Muller come to this conclusion?**

Each addition of the *wt* gene introduces the normally active gene along with the over reactive gene so  $\frac{mut}{\Delta} = 2x \text{ gene product } \left(\frac{wt}{wt}\right) \cdot \frac{mut}{wt} = 3x \text{ gene product}$   
 and  $\frac{mut}{2xwt} = 4x \text{ the amount of gene product}$

**In molecular terms, how could a mutation increase, but not change the activity of a gene product?**

The mutation could increase the binding efficiency of the enzyme or change the conformation binding site of the enzyme to always on,

submit

© quixotic partners

## Mendel's Factors & Muller's mutations - page 7 of 9

At this point, we have found a way to identify (using deletions and duplications of the gene under study), whether a mutation abolishes gene function, reduces it, or enhances it. But are there other possible effects of a mutation?

Muller found some. Consider the following is the case. The trait is dominant<sup>†</sup> and the phenotype of

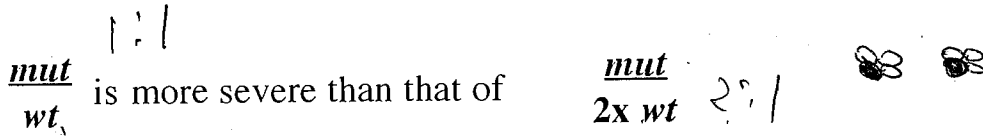

Muller called mutations that behaved in this way **antimorphic**, that is, the mutated gene product function antagonized the function of the wild type gene product.

A related behavior can be observed with a recessive trait, in this case

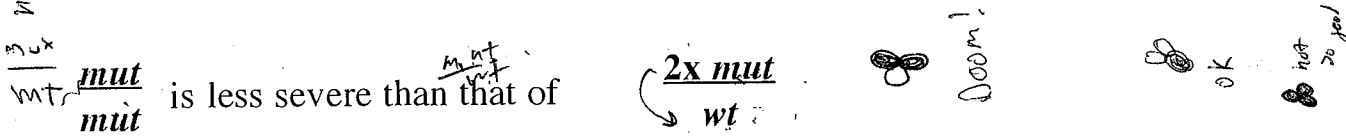

but this requires that we have a duplication of the mutant allele.

As you answer these questions, remember, there is rarely a single correct answer.

**How (do you think) did Muller come to his conclusion about antimorphic mutations?**

In this case it is desirable to make a <sup>different</sup> protein as opposed to a protein that disrupts the wildtype functional protein because if you make two of a protein that is bad and one that is good but they can't work together. However an only mutant protein may work.

**In molecular terms, how could a mutation produce an antimorphic gene product?**

See above.



## Mendel's Factors & Muller's mutations - page 8 of 9

Muller identified one final class of mutation, their behavior was described by the following relationship; the phenotype of

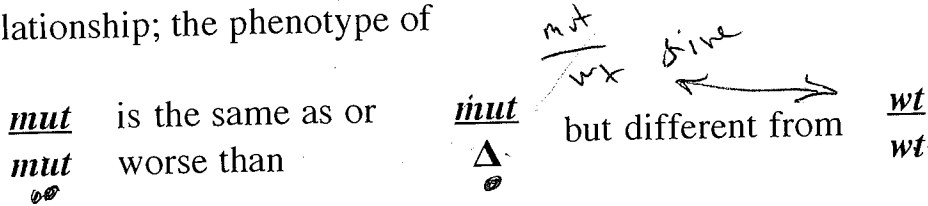

Remember, we are assuming that *mut* is recessive!  
 If *mut* is dominant then the phenotype of

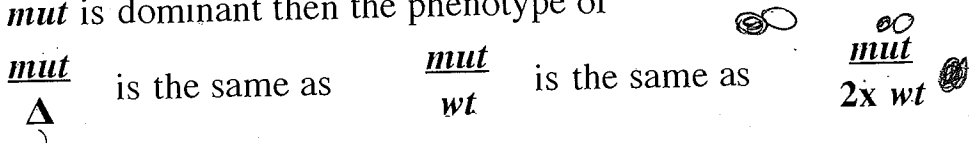

Muller called such mutations **neomorphic**; he assumed that the mutated gene product had a new function or activity, a function/activity that the original gene product did not have.

As you answer these questions, remember, there is rarely a single correct answer.

How (do you think) did Muller come to this conclusion? ?

Because it produces a different function than  $\frac{wt}{wt}$  it must have a new function

In molecular terms, how could a mutation produce a neomorphic gene product?

Could alter the binding specificity to other cells and activate a different protein

submit

© quixotic partners

---

## Mendel's Factors & Muller's mutations – page 9 of 9

---

At this point we have exhausted the universe of possible types of mutations. For any particular trait, influenced by a mutation, we can place the mutation in one of Muller's groups, or in the group with no effect, which we could call neutral or "normomorphic".

That said, remember we are talking about the mutation's effects on a single trait. The situation gets more complex when we recognize that many traits are influenced by multiple genes, and many genes influence multiple traits, but we will worry about that elsewhere.

As you answer these questions, remember, there is rarely a single correct answer.

**Which types of mutation might enhance an organism's ability to adapt to a new environment, and how would that work?**

**If mutations are random, how can they generate new behaviors, functions, and adaptations?**

**submit**

© quixotic partners

## Mendel's Factors & Muller's mutations - page 1 of 9

As you almost certainly already know (and can review here), in the 1800's Mendel deduced the existence of genetic factors (which we now know as genes).

These factors are passed unaltered from parent to offspring - but importantly, not all factors held by a parent are transmitted (note on simplifications).

Each parent has two copies of each gene, but one and only one copy is transmitted to any particular offspring. Which copy is transmitted is random (stochastic).

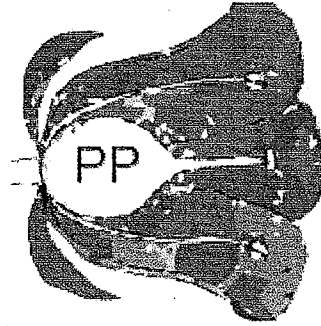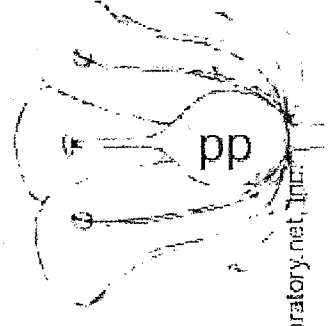

Mendel's hypothesis:

Pure-bred lines carry two copies of the factor that determines flower color.

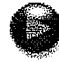

©2001 - virtuellaboratory.net, Inc.

As you answer these questions, remember, there is rarely a single correct answer.

### What did Mendel know about the physical nature of his factors?

- He knew they were heretible.
- He knew they were involved with sex. (pollen, egg, anatomy)

### Does thinking at the molecular level clarify or confuse your understanding genes and mutations?

- Clarify, because it gives us physical, concrete, processes for heretible traits.

submit

© quixotic partners

## Mendel's Factors & Muller's mutations – page 2 of 9

One of Mendel's major discoveries was that genes can exist in different forms, now known as **alleles**. Within a particular organism, there are two alleles of each gene; these alleles can be the same or different.

While there are at most two different alleles within a single organism, there can be many different alleles within a population. Typically, the most common alleles are known as "wild type".

An important question is, where did these various alleles come from? One hint came from the observation that new alleles could arise spontaneously - these new alleles are known as mutations.

Herman J. Muller won the Nobel prize in 1946 for his work showing that mutations could be generated by exposing an organism to radiation, specifically X-rays.

As you answer these questions, remember, there is rarely a single correct answer.

**What does the ability of X-rays to generate mutations tell you about the physical nature of genes?**

They are stored in physical objects that are delicate enough to produce error.

**Does it tell you anything about the physical nature of gene products?**

- They are very small
- They are also prone to error or change.

**submit**

© quixotic partners

## Mendel's Factors & Muller's mutations – page 3 of 9

Let us assume that each gene encodes a gene product (we are not concerned about what a gene product is or what it does). We can now consider all of the logically possible effects of a mutation. Compared to the original, or "wild type" gene product ("*wt*"), the mutant gene product ("*mut*") could be

- more active
- less active
- totally inactive or absent, or
- have a new activity

There are two more possibilities. The first arises because there are two copies of each gene in an organism – it is therefore possible that the mutated (*mut*) gene product could interfere with the activity of the wild type (*wt*) gene product. We will call this

- antagonistic

Finally, there could be mutations that produce no visible effect, we will call these

- neutral

As you can imagine, neutral mutations are difficult to identify or study.

As you answer this question, remember, there is rarely a single correct answer.

- When a mutation in a gene occurs, the mutated gene product is most likely to be (compared to the original gene product)...
- neutral
  - more active
  - less active
  - inactive or absent
  - have a new activity
  - interfere with the activity of the wild type gene product

Please explain the logic of your answer.

Most genetic information is not crucial to the success of a gene product. For example, our genomes contain lots of code that is never even accessed for information.

submit

## Mendel's Factors & Muller's mutations – page 4 of 9

Now here is Muller's trick - a way of evaluating the activity of a gene without knowing what that activity is!

In the fruit fly *Drosophila melanogaster*, the organism that Muller worked with, it is possible to make deletions and duplications of genes. We can analyze their effects based on some (over simplistic) assumptions:

- the deletion of a gene (which we note as  $\Delta$ ) leads to the absence of the gene product.
- the duplication of a gene (which we note as  $2x$ ) leads to twice the gene activity.

As you answer this question, remember, there is rarely a single correct answer.

**If you know your molecular biology, you know that there are cases where these assumptions are not strictly true. Can you describe such situations.**

many genes are redundant...  $\rightarrow$  deletion of one copy of the gene might not knock out the whole product that the genome encodes for...

gene activity also might depend on substrate levels — more gene product doesn't equal more substrate

submit

© quixotic partners

## Mendel's Factors & Muller's mutations – page 5 of 9

We will use deletions and duplication to compare the activity of the original version of the gene (*wt*) with the mutant version (*mut*). *Drosophila* is diploid, so there are (normally) two copies of each gene. We indicate our situation as

$\frac{wt}{wt}$  produces the original phenotype

$\frac{mut}{wt}$  produces the mutant phenotype, if *mut* is dominant

$\frac{mut}{mut}$  produces the mutant phenotype, if *mut* is recessive

For the moment, let us assume that *mut* is recessive for the trait we are looking at (remember, recessive and dominant are not absolutes; a mutation/allele can be recessive for one trait and dominant for another).

Now let us ask, is the phenotype of

$\frac{mut}{\Delta}$  the same, more, or less severe (extreme) than the phenotype of  $\frac{mut}{mut}$  ?

If  $\frac{mut}{\Delta}$  and  $\frac{mut}{mut}$  individuals have the same phenotype, Muller concluded that that *mut* does not encode a functional gene product; either no product is produced or the product produced has no activity - he called such a mutation/allele **amorphic** (no activity).

If the phenotype of  $\frac{mut}{mut}$  is less severe than that of  $\frac{mut}{\Delta}$ , Muller concluded that *mut* produced a gene product with some, but less than normal activity - he called that a **hypomorphic** (low activity) allele.

As you answer these questions, remember, there is rarely a single correct answer.

### Why (do you think) Muller come to these conclusions?

~~context~~ amorphic — if the amount of mutated gene product floating around doesn't change phenotype, then product has no activity  
for hypomorphic — if  $\frac{mut}{mut}$  (more gene product) is more active than  $\frac{mut}{\Delta}$ , then product must do stuff

In molecular terms, how might a mutation reduce but not eliminate or change the activity of a gene product ?

whether silent (thank you redundant aa code) or recessive or minor, the mutation can affect efficiency of protein ~~more~~

rather than an all-or-nothing mutation.

## Mendel's Factors & Muller's mutations - page 6 of 9

To extend our analysis, let us now compare the "strength" of the trait expressed in organisms with the following genotypes. Remember we have been assuming that that *mut* is recessive. We find that the phenotype of

*mut* is more severe than that of *wt*  
*mut*  $\Delta$

If *mut* is dominant (with respect to the trait we are considering) then,

*mut* is more severe than that of *wt*  $\Delta$  which is more severe than *mut*  
 2x *wt*  $\Delta$

Muller concluded that *mut* produced either more of, or a more active version of the gene product than *wt* version of the gene. He termed such an allele **hypermorphic** (more function).

As you answer these questions, remember, there is rarely a single correct answer.

**How (do you think) did Muller come to this conclusion?**

• In observing phenotypes of these different combinations, Muller noticed that the presence of a hypermorphic gene was enough to cause problems. This indicates a dominant or gain-of-function mutant product.

**In molecular terms, how could a mutation increase, but not change the activity of a gene product?**

Mutation of a transcription factor will not change the activity of a gene, but may affect how readily the gene is transcribed.

submit

© quixotic partners



## Mendel's Factors & Muller's mutations – page 7 of 9

At this point, we have found a way to identify (using deletions and duplications of the gene under study), whether a mutation abolishes gene function, reduces it, or enhances it. But are there other possible effects of a mutation?

Muller found some. Consider the following is the case. The trait is dominant and the phenotype of

$\frac{mut}{wt}$  is more severe than that of  $\frac{mut}{2x wt}$

Muller called mutations that behaved in this way **antimorphic**, that is, the mutated gene product function antagonized the function of the wild type gene product.

A related behavior can be observed with a recessive trait, in this case

$\frac{mut}{mut}$  is less severe than that of  $\frac{2x mut}{wt}$

but this requires that we have a duplication of the mutant allele.

As you answer these questions, remember, there is rarely a single correct answer.

**How (do you think) did Muller come to his conclusion about antimorphic mutations?**

he noticed that the interaction of  $mut\ w/wt$  was ~~is~~ more severe than  $mut/mut$ , indicating that the interaction is more important than the change in gene product function

**In molecular terms, how could a mutation produce an antimorphic gene product?**

If the mutation creates a prion-like product, that product can then go 'infect' or negatively affect the  $wt$  product

submit

## Mendel's Factors & Muller's mutations – page 8 of 9

Muller identified one final class of mutation, their behavior was described by the following relationship; the phenotype of

$\frac{mut}{mut}$  is the same as or worse than  $\frac{mut}{\Delta}$  but different from  $\frac{wt}{wt}$

Remember, we are assuming that *mut* is recessive!  
If *mut* is dominant then the phenotype of

$\frac{mut}{\Delta}$  is the same as  $\frac{mut}{wt}$  is the same as  $\frac{mut}{2x wt}$

Muller called such mutations **neomorphic**; he assumed that the mutated gene product had a new function or activity, a function/activity that the original gene product did not have.

As you answer these questions, remember, there is rarely a single correct answer.

**How (do you think) did Muller come to this conclusion? ?**

He observed a gain-of-function mutation. This may have been done by observing a gene product in a new area post-mutation.

**In molecular terms, how could a mutation produce a neomorphic gene product?**

A single point mutation can completely alter the catalytic activity of the gene product, giving it new dominantly behaving functions.

submit

© quixotic partners

## Mendel's Factors & Muller's mutations - page 9 of 9

At this point we have exhausted the universe of possible types of mutations. For any particular trait, influenced by a mutation, we can place the mutation in one of Muller's groups, or in the group with no effect, which we could call neutral or "normomorphic".

That said, remember we are talking about the mutation's effects on a single trait. The situation gets more complex when we recognize that many traits are influenced by multiple genes, and many genes influence multiple traits, but we will worry about that elsewhere.

As you answer these questions, remember, there is rarely a single correct answer.

**Which types of mutation might enhance an organism's ability to adapt to a new environment, and how would that work?**

any random mutation that happens to ~~occur~~ interact w/ the new environment in a positive way for the organisms (i.e. dealing w/ toxics, slight body structure changes, etc.)

**If mutations are random, how can they generate new behaviors, functions, and adaptations?**

only one mutation can uncover a whole host of ~~other~~ mutations that have been building up, ~~or~~ perhaps creating new ~~or~~ adaptations . . .

**submit**

© quixotic partners

## Mendel's Factors & Muller's mutations – page 1 of 9

As you almost certainly already know (and can review here), in the 1800's Mendel deduced the existence of genetic factors (which we now know as genes).

These factors are passed unaltered from parent to offspring - but importantly, not all factors held by a parent are transmitted (note on simplifications).

Each parent has two copies of each gene, but one and only one copy is transmitted to any particular offspring. Which copy is transmitted is random (stochastic).

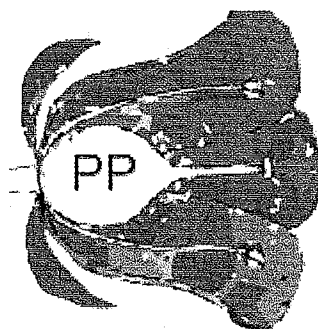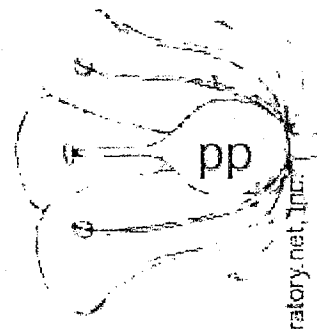

Mendel's hypothesis:

Pure-bred lines carry two copies of the factor that determines flower color.

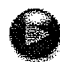

As you answer these questions, remember, there is rarely a single correct answer.

**What did Mendel know about the physical nature of his <sup>genes</sup> factors?**

*He knew that it passed down from parent to offspring. He understood the concept of dominant and recessive.*

**Does thinking at the molecular level clarify or confuse your understanding genes and mutations?**

*Clarifies those concepts.*

**submit**

© quixotic partners

## Mendel's Factors & Muller's mutations - page 2 of 9

One of Mendel's major discoveries was that genes can exist in different forms, now known as **alleles**. Within a particular organism, there are two alleles of each gene; these alleles can be the same or different.

While there are at most two different alleles within a single organism, there can be many different alleles within a population. Typically, the most common alleles are known as "wild type".

An important question is, where did these various alleles come from? One hint came from the observation that new alleles could arise spontaneously - these new alleles are known as mutations.

Herman J. Muller won the Nobel prize in 1946 for his work showing that mutations could be generated by exposing an organism to radiation, specifically X-rays.

As you answer these questions, remember, there is rarely a single correct answer.

**What does the ability of X-rays to generate mutations tell you about the physical nature of genes?**

Genes can mutate and therefore induce variability in a species/community.

**Does it tell you anything about the physical nature of gene products?**

That genes code for specific phenotypes - these phenotypes vary due to the genetic code.

**submit**

© quixotic partners

## Mendel's Factors & Muller's mutations – page 3 of 9

Let us assume that each gene encodes a gene product (we are not concerned about what a gene product is or what it does). We can now consider all of the logically possible effects of a mutation. Compared to the original, or "wild type" gene product ("*wt*"), the mutant gene product ("*mut*") could be

- more active
- less active
- totally inactive or absent, or
- have a new activity

There are two more possibilities. The first arises because there are two copies of each gene in an organism – it is therefore possible that the mutated (*mut*) gene product could interfere with the activity of the wild type (*wt*) gene product. We will call this

- antagonistic

Finally, there could be mutations that produce no visible effect, we will call these

- neutral

As you can imagine, neutral mutations are difficult to identify or study.

As you answer this question, remember, there is rarely a single correct answer.

When a mutation in a gene occurs, the mutated gene product is most likely to be (compared to the original gene product)...

neutral  
 more active  
 less active  
 inactive or absent  
 have a new activity  
 interfere with the activity of the wild type gene product

**Please explain the logic of your answer.**

*Because you have 2 copies of that gene, unless the gene that is mutated is the dominant allele in a heterozygous pair of alleles it won't be affected.*

**submit**

## Mendel's Factors & Muller's mutations - page 4 of 9

Now here is Muller's trick - a way of evaluating the activity of a gene without knowing what that activity is!

In the fruit fly *Drosophila melanogaster*, the organism that Muller worked with, it is possible to make deletions and duplications of genes. We can analyze their effects based on some (over simplistic) assumptions:

- the deletion of a gene (which we note as  $\Delta$ ) leads to the absence of the gene product.
- the duplication of a gene (which we note as  $2x$ ) leads to twice the gene activity.

As you answer this question, remember, there is rarely a single correct answer.

**If you know your molecular biology, you know that there are cases where these assumptions are not strictly true. Can you describe such situations.**

One situation is when a gene is silenced - so that the gene product is not expressed.

Also, you can have RNA regulation that can cause the gene product to be degraded too quickly or not quickly at all.

The number of promoters for that gene can affect expression.

**submit**

© quixotic partners

## Mendel's Factors & Muller's mutations – page 5 of 9

We will use deletions and duplication to compare the activity of the original version of the gene (*wt*) with the mutant version (*mut*). *Drosophila* is diploid, so there are (normally) two copies of each gene. We indicate our situation as

$\frac{wt}{wt}$  produces the original phenotype

$\frac{mut}{wt}$  produces the mutant phenotype, if *mut* is dominant

$\frac{mut}{mut}$  produces the mutant phenotype, if *mut* is recessive

For the moment, let us assume that *mut* is recessive for the trait we are looking at (remember, recessive and dominant are not absolutes; a mutation/allele can be recessive for one trait and dominant for another).

Now let us ask, is the phenotype of

$\frac{mut}{\Delta}$  the same, more, or less severe (extreme) than the phenotype of  $\frac{mut}{mut}$  ?

If  $\frac{mut}{\Delta}$  and  $\frac{mut}{mut}$  individuals have the same phenotype, Muller concluded that that *mut* does not encode a functional gene product; either no product is produced or the product produced has no activity - he called such a mutation/allele **amorphic** (no activity).

If the phenotype of  $\frac{mut}{mut}$  is less severe than that of  $\frac{mut}{\Delta}$ , Muller concluded that *mut* produced a gene product with some, but less than normal activity - he called that a **hypomorphic** (low activity) allele.

As you answer these questions, remember, there is rarely a single correct answer.

### Why (do you think) Muller come to these conclusions?

by observing phenotypes he came to these conclusions in the first one if there is no phenotype change then the gene is not important, but in the second there is gene function and without the second gene there is more of a mutant phenotype meaning there has to be a protein product produced.

In molecular terms, how might a mutation reduce but not eliminate or change the activity of a gene product? The mutation might not change the structure of the protein then the activity is not greatly affected. It depends on the change of the amino acids.



## Mendel's Factors & Muller's mutations – page 6 of 9

To extend our analysis, let us now compare the "strength" of the trait expressed in organisms with the following genotypes. Remember we have been assuming that that *mut* is recessive. We find that the phenotype of

*mut* is more severe than that of *wt*  $\Delta$

If *mut* is dominant (with respect to the trait we are considering) then,

*mut* is more severe than that of *wt*  $\Delta$  which is more severe than *mut*  $\Delta$

Muller concluded that *mut* produced either more of, or a more active version of the gene product than *wt* version of the gene. He termed such an allele **hypermorphic** (more function).

As you answer these questions, remember, there is rarely a single correct answer.

**How (do you think) did Muller come to this conclusion?**

because there is more gene product, the mutated one is having more effect than the wild type one.

**In molecular terms, how could a mutation increase, but not change the activity of a gene product?**

The mutation could be in an active site making it more active but still w/ the same function or the protein may not be degraded as fast.

**submit**

© quixotic partners

## Mendel's Factors & Muller's mutations - page 7 of 9

At this point, we have found a way to identify (using deletions and duplications of the gene under study), whether a mutation abolishes gene function, reduces it, or enhances it. But are there other possible effects of a mutation?

Muller found some. Consider the following is the case. The trait is dominant and the phenotype of

$\frac{mut}{wt}$  is more severe than that of  $\frac{mut}{2x wt}$

Muller called mutations that behaved in this way **antimorphic**, that is, the mutated gene product function antagonized the function of the wild type gene product.

A related behavior can be observed with a recessive trait, in this case

$\frac{mut}{mut}$  is less severe than that of  $\frac{2x mut}{wt}$

but this requires that we have a duplication of the mutant allele.

As you answer these questions, remember, there is rarely a single correct answer.

**How (do you think) did Muller come to his conclusion about antimorphic mutations?**

There is a competitive relationship, the mutated product must measure the wild type product when there is more wild type the mutated product is not as evident.

**In molecular terms, how could a mutation produce an antimorphic gene product?**

The mutant product is competing with the wt and if it is more active then it can affect the function of the wt.

## Mendel's Factors & Muller's mutations – page 8 of 9

Muller identified one final class of mutation, their behavior was described by the following relationship; the phenotype of

$\frac{mut}{mut}$  is the same as or worse than  $\frac{mut}{\Delta}$  but different from  $\frac{wt}{wt}$

Remember, we are assuming that *mut* is recessive!  
If *mut* is dominant then the phenotype of

$\frac{mut}{\Delta}$  is the same as  $\frac{mut}{wt}$  is the same as  $\frac{mut}{2x wt}$

Muller called such mutations **neomorphic**; he assumed that the mutated gene product had a new function or activity, a function/activity that the original gene product did not have.

As you answer these questions, remember, there is rarely a single correct answer.

**How (do you think) did Muller come to this conclusion? ?**

There is no change in phenotype so the wt is not being affected the mutant takes over function for the wild type.

**In molecular terms, how could a mutation produce a neomorphic gene product?**

It changes the amino acid sequence enough to change the function of a protein.

submit

© quixotic partners

## Mendel's Factors & Muller's mutations - page 9 of 9

At this point we have exhausted the universe of possible types of mutations. For any particular trait, influenced by a mutation, we can place the mutation in one of Muller's groups, or in the group with no effect, which we could call neutral or "normomorphic".

That said, remember we are talking about the mutation's effects on a single trait. The situation gets more complex when we recognize that many traits are influenced by multiple genes, and many genes influence multiple traits, but we will worry about that elsewhere.

As you answer these questions, remember, there is rarely a single correct answer.

**Which types of mutation might enhance an organism's ability to adapt to a new environment, and how would that work?**

Different mutations could change the cell membrane to help the organism survive in new environments such as new salinity or cholesterol content.

**If mutations are random, how can they generate new behaviors, functions, and adaptations?**

Mutations create variability, if the mutation is good for the environment then it will stick around, if not then it will disappear.

**submit**

© quixotic partners

## Mendel's Factors & Muller's mutations – page 1 of 9

As you almost certainly already know (and can review here), in the 1800's Mendel deduced the existence of genetic factors (which we now know as genes).

These factors are passed unaltered from parent to offspring - but importantly, not all factors held by a parent are transmitted (note on simplifications).

Each parent has two copies of each gene, but one and only one copy is transmitted to any particular offspring. Which copy is transmitted is random (stochastic).

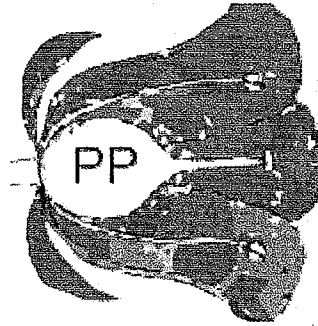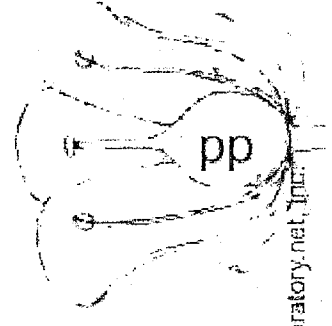

Mendel's hypothesis:

Pure-bred lines carry two copies of the factor that determines flower color.

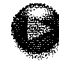

©2001 - virtuallaboratory.net, Inc.

As you answer these questions, remember, there is rarely a single correct answer.

### What did Mendel know about the physical nature of his factors?

He saw certain traits that showed up more than others. He saw traits that the parents didn't have. Saw ~~amounts~~ patterns of certain traits.

### Does thinking at the molecular level clarify or confuse your understanding genes and mutations?

The molecular clarifies our understanding of genes and mutations.

submit

© quixotic partners

## Mendel's Factors & Muller's mutations – page 2 of 9

One of Mendel's major discoveries was that genes can exist in different forms, now known as **alleles**. Within a particular organism, there are two alleles of each gene; these alleles can be the same or different.

While there are at most two different alleles within a single organism, there can be many different alleles within a population. Typically, the most common alleles are known as "wild type".

An important question is, where did these various alleles come from? One hint came from the observation that new alleles could arise spontaneously - these new alleles are known as mutations.

Herman J. Muller won the Nobel prize in 1946 for his work showing that mutations could be generated by exposing an organism to radiation, specifically X-rays.

As you answer these questions, remember, there is rarely a single correct answer.

**What does the ability of X-rays to generate mutations tell you about the physical nature of genes?**

X-rays can affect the DNA which affects genes in the DNA.

**Does it tell you anything about the physical nature of gene products?**

If the gene changes than the gene products will change.

**submit**

© quixotic partners

## Mendel's Factors & Muller's mutations – page 3 of 9

Let us assume that each gene encodes a gene product (we are not concerned about what a gene product is or what it does). We can now consider all of the logically possible effects of a mutation. Compared to the original, or "wild type" gene product ("*wt*"), the mutant gene product ("*mut*") could be

- more active
- less active
- totally inactive or absent, or
- have a new activity

There are two more possibilities. The first arises because there are two copies of each gene in an organism – it is therefore possible that the mutated (*mut*) gene product could interfere with the activity of the wild type mutant (*wt*) gene product. We will call this

- antagonistic

Finally, there could be mutations that produce no visible effect, we will call these

- neutral

As you can imagine, neutral mutations are difficult to identify or study.

As you answer this question, remember, there is rarely a single correct answer.

When a mutation in a gene occurs, the mutated gene product is most likely to be (compared to the original gene product)...

|                                     |                                                           |
|-------------------------------------|-----------------------------------------------------------|
| <input checked="" type="checkbox"/> | neutral                                                   |
| <input type="checkbox"/>            | more active                                               |
| <input type="checkbox"/>            | less active                                               |
| <input type="checkbox"/>            | inactive or absent                                        |
| <input type="checkbox"/>            | have a new activity                                       |
| <input type="checkbox"/>            | interfere with the activity of the wild type gene product |

**Please explain the logic of your answer.**

Because organisms have different DNA sequence but still have the same function so they are neutral. otherwise there would be no variation and no evolution.

**submit**

## Mendel's Factors & Muller's mutations - page 4 of 9

Now here is Muller's trick - a way of evaluating the activity of a gene without knowing what that activity is!

In the fruit fly *Drosophila melanogaster*, the organism that Muller worked with, it is possible to make deletions and duplications of genes. We can analyze their effects based on some (over simplistic) assumptions:

- the deletion of a gene (which we note as  $\Delta$ ) leads to the absence of the gene product.
- the duplication of a gene (which we note as  $2x$ ) leads to twice the gene activity.

As you answer this question, remember, there is rarely a single correct answer.

**If you know your molecular biology, you know that there are cases where these assumptions are not strictly true. Can you describe such situations.**

Other factors regulated gene activity so just because a gene is duplicated doesn't mean it will have twice the activity.

**submit**

© quixotic partners



## Mendel's Factors & Muller's mutations - page 5 of 9

We will use deletions and duplication to compare the activity of the original version of the gene (*wt*) with the mutant version (*mut*). *Drosophila* is diploid, so there are (normally) two copies of each gene. We indicate our situation as

$\frac{wt}{wt}$  produces the original phenotype

$\frac{mut}{wt}$  produces the mutant phenotype, if *mut* is dominant

$\frac{mut}{mut}$  produces the mutant phenotype, if *mut* is recessive

For the moment, let us assume that *mut* is recessive for the trait we are looking at (remember, recessive and dominant are not absolutes; a mutation/allele can be recessive for one trait and dominant for another).

Now let us ask, is the phenotype of

$\frac{mut}{\Delta}$  the same, more, or less severe (extreme) than the phenotype of  $\frac{mut}{mut}$  ?

If  $\frac{mut}{\Delta}$  and  $\frac{mut}{mut}$  individuals have the same phenotype, Muller concluded that that *mut* does not encode a functional gene product; either no product is produced or the product produced has no activity - he called such a mutation/allele **amorphic** (no activity).

If the phenotype of  $\frac{mut}{mut}$  is less severe than that of  $\frac{mut}{\Delta}$ , Muller concluded that *mut* produced a gene product with some, but less than normal activity - he called that a **hypomorphic** (low activity) allele.

As you answer these questions, remember, there is rarely a single correct answer.

### Why (do you think) Muller come to these conclusions?

The first conclusion is because the *mut* gene is not active so  $\frac{mut}{mut}$  and  $\frac{mut}{\Delta}$  have the same phenotype.  
The second one is that  $\frac{mut}{\Delta}$  only has one copy so less gene product is produced.

In molecular terms, how might a mutation reduce but not eliminate or change the activity of a gene product ?

It could change the DNA sequence that recruits the transcription machinery.

## Mendel's Factors & Muller's mutations – page 6 of 9

To extend our analysis, let us now compare the "strength" of the trait expressed in organisms with the following genotypes. Remember we have been assuming that that *mut* is recessive. We find that the phenotype of

*mut* is more severe than that of *wt*  
*mut*  $\Delta$

If *mut* is dominant (with respect to the trait we are considering) then,

*mut* is more severe than that of *2x wt* which is more severe than *mut*  
 $\Delta$

Muller concluded that *mut* produced either more of, or a more active version of the gene product than *wt* version of the gene. He termed such an allele **hypermorphic** (more function).

As you answer these questions, remember, there is rarely a single correct answer.

**How (do you think) did Muller come to this conclusion?**

So with the *mut/2xwt* there is 3x the activity compared to *mut/wt* which is 2x the activity of *mut/\Delta*.

**In molecular terms, how could a mutation increase, but not change the activity of a gene product?**

a better sequence or an enhancer added for the transcription machinery.

submit

© quixotic partners

## Mendel's Factors & Muller's mutations – page 7 of 9

At this point, we have found a way to identify (using deletions and duplications of the gene under study), whether a mutation abolishes gene function, reduces it, or enhances it. But are there other possible effects of a mutation?

Muller found some. Consider the following is the case. The trait is dominant and the phenotype of

$\frac{mut}{wt}$  is more severe than that of  $\frac{mut}{2x wt}$

Muller called mutations that behaved in this way **antimorphic**, that is, the mutated gene product function antagonized the function of the wild type gene product.

A related behavior can be observed with a recessive trait, in this case

$\frac{mut}{mut}$  is less severe than that of  $\frac{2x mut}{wt}$

but this requires that we have a duplication of the mutant allele.

As you answer these questions, remember, there is rarely a single correct answer.

**How (do you think) did Muller come to his conclusion about antimorphic mutations?**

So  $mut/2x wt$  has more  $wt$  gene product so that would dominate compared to  $mut/wt$  which would compete with each other.

**In molecular terms, how could a mutation produce an antimorphic gene product?**

The mutant product could bind to the  $wt$  product or compete for the same molecules.

## Mendel's Factors & Muller's mutations – page 8 of 9

Muller identified one final class of mutation, their behavior was described by the following relationship; the phenotype of

$\frac{mut}{mut}$  is the same as or worse than  $\frac{mut}{\Delta}$  but different from  $\frac{wt}{wt}$

Remember, we are assuming that *mut* is recessive!  
If *mut* is dominant then the phenotype of

$\frac{mut}{\Delta}$  is the same as  $\frac{mut}{wt}$  is the same as  $\frac{mut}{2x wt}$

Muller called such mutations **neomorphic**; he assumed that the mutated gene product had a new function or activity, a function/activity that the original gene product did not have.

As you answer these questions, remember, there is rarely a single correct answer.

**How (do you think) did Muller come to this conclusion? ?**

So the  $mut/mut$  and  $mut/\Delta$  have a different phenotype than  $wt/wt$ .

**In molecular terms, how could a mutation produce a neomorphic gene product?**

The gene product could be different and now can act on another molecule.

submit

© quixotic partners

## Mendel's Factors & Muller's mutations – page 9 of 9

At this point we have exhausted the universe of possible types of mutations. For any particular trait, influenced by a mutation, we can place the mutation in one of Muller's groups, or in the group with no effect, which we could call neutral or "normomorphic".

That said, remember we are talking about the mutation's effects on a single trait. The situation gets more complex when we recognize that many traits are influenced by multiple genes, and many genes influence multiple traits, but we will worry about that elsewhere.

As you answer these questions, remember, there is rarely a single correct answer.

**Which types of mutation might enhance an organism's ability to adapt to a new environment, and how would that work?**

neomorphs could allow the new activity to be helpful for the organism.

**If mutations are random, how can they generate new behaviors, functions, and adaptations?**

mutations can cause less activity of a gene or functions.

**submit**

© quixotic partners
